# Supplementary material
Source: PubMed Central journal article supplement (PMC6330710)
Supplement: NIHMS997476-supplement-Supplemental.pdf [file NIHMS997476-supplement-Supplemental.pdf]

**Supplemental Table 1. Characterization of fluorophore-encapsulated acetalated dextran microparticles.** Hydrodynamic size and encapsulation efficiency of Ace-DEX MPs encapsulating various fluorophores using either Texas Red-conjugated dextran (TR/Ace-DEX) or native dextran with various relative cyclic acetal coverages (CAC). Data are presented as mean  $\pm$  standard deviation (n=3).

| Formulation                       | Relative CAC (%) | Cargo    | Hydrodynamic Size (nm) | Weight Loading (% w/w) | Encapsulation Efficiency (%) |
|-----------------------------------|------------------|----------|------------------------|------------------------|------------------------------|
| <b>TR/Ace-DEX MPs</b>             | 26%              | Blank    | 209 $\pm$ 23           | -                      | -                            |
| <b>Native Dextran Ace-DEX MPs</b> | 26%              | Blank    | 419 $\pm$ 47           | -                      | -                            |
|                                   | 55%              | Blank    | 196 $\pm$ 12           | -                      | -                            |
|                                   | 26%              | FITC-BSA | 495 $\pm$ 84           | 1                      | 89.7 $\pm$ 2.3               |
|                                   | 55%              | FITC-BSA | 546 $\pm$ 56           | 1                      | 87.7 $\pm$ 1.1               |
|                                   | 55%              | ICG      | 422 $\pm$ 72           | 1.3                    | 68.2 $\pm$ 6.7               |

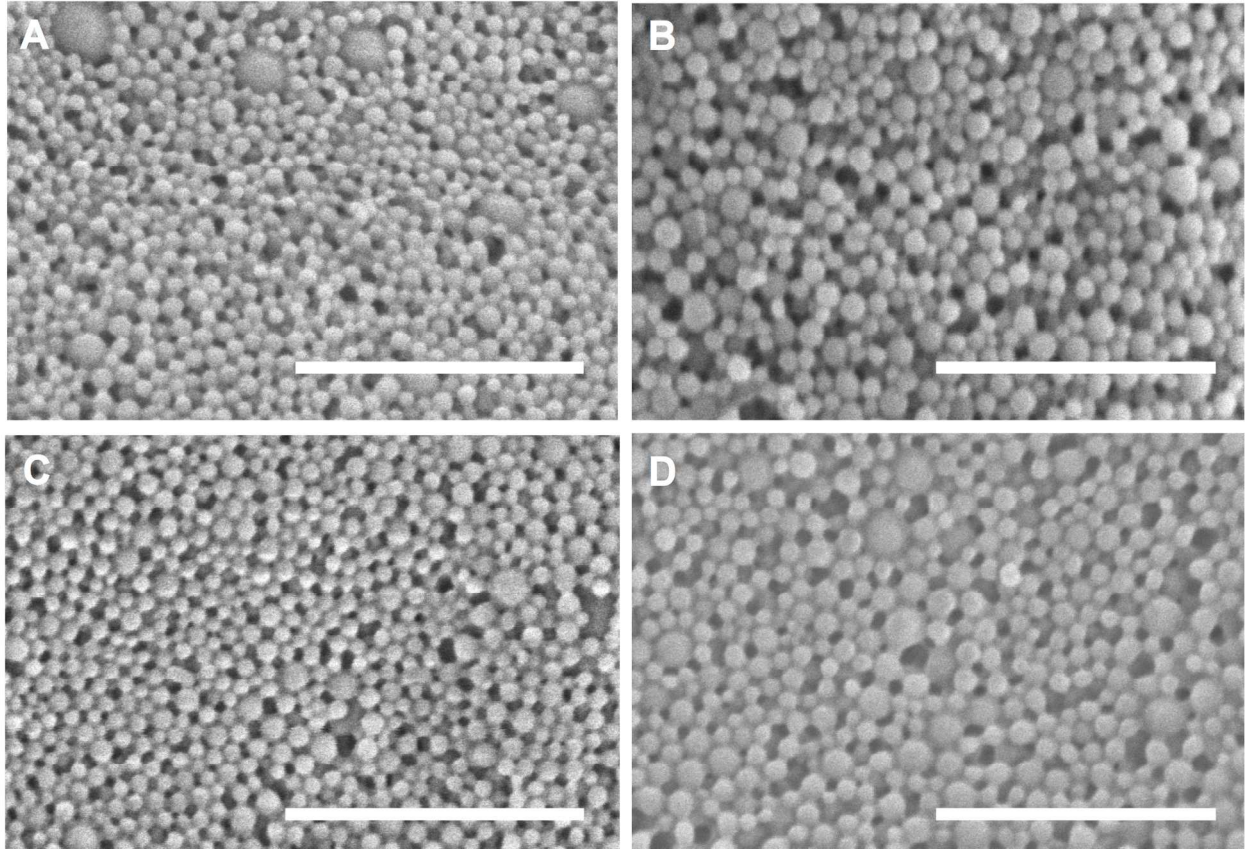

**Supplemental Figure 1. Scanning electron microscopy images of Ace-DEX MPs.** Scanning electron micrographs of Ace-DEX MPs composed of (A) Texas Red-conjugated Ace-DEX (TR/MP), native polymer with (B) 26% CAC or (C) 55% CAC encapsulating fluorescein-bovine serum albumin (FITC-BSA/MP), or (D) indocyanine green (ICG/MP). Representative image of three independent experiments. Scale bar is 1  $\mu\text{m}$ .

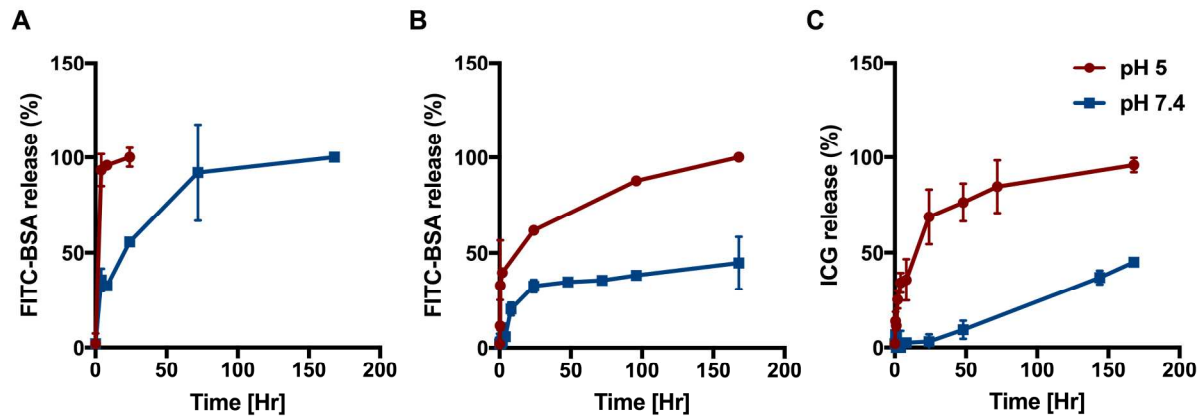

**Supplemental Figure 2. Drug release kinetics of Ace-DEX MPs encapsulating FITC-BSA or ICG.** *In vitro* drug release performed at pH 5 and pH 7.4 of (A) 26% CAC FITC-BSA/MPs, (B) 55% CAC FITC-BSA/MPs, or (C) ICG/MPs. Values are reported as mean percent release normalized to the zero time point  $\pm$  SEM.

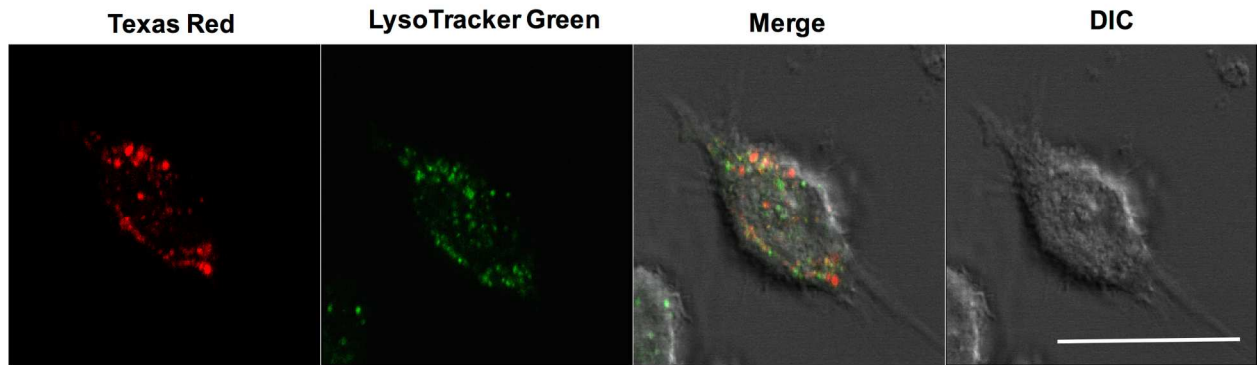

**Supplemental Figure 3. Confocal microscopic analysis 5h post-exposure to Texas Red/Ace-DEX MPs.** Ace-DEX MPs composed of Texas Red-conjugated Ace-DEX were delivered to bone marrow-derived macrophages for 5 hours, followed by live cell imaging using laser scanning confocal microscopy (40x oil immersion). Red: Texas Red microparticles, green: LysoTracker Green dye. Representative image of three independent experiments. Scale bar is 10  $\mu\text{m}$ .
